# Supplementary material for: Evidences of starch–microwave interactions under hydrolytic and pyrolytic conditions
Source: Royal Society of Chemistry journal article supplement (doi:10.1039/d0gc02644a), 2020-01-01
Supplement: d0gc02644a1.pdf [file d0gc02644a1.pdf]

## Supporting Information

### **Evidences of starch-microwave interactions under hydrolytic and pyrolytic conditions**

Iris K.M. Yu <sup>a,b</sup>, Jiajun Fan <sup>a,#</sup>, Vitaliy L. Budarin <sup>a,^</sup>, Florent P. Bouxin <sup>a</sup>, James H. Clark <sup>a</sup>, Daniel C.W. Tsang <sup>b,\*</sup>

<sup>a</sup> Green Chemistry Centre of Excellence, Department of Chemistry, University of York, York, YO10 5DD, UK

<sup>b</sup> Department of Civil and Environmental Engineering, The Hong Kong Polytechnic University, Hung Hom, Kowloon, Hong Kong, China

*#Corresponding author:* [alice.fan@york.ac.uk](mailto:alice.fan@york.ac.uk)

*^Corresponding author:* [vitaliy.budarin@york.ac.uk](mailto:vitaliy.budarin@york.ac.uk)

*\*Corresponding author:* [dan.tsang@polyu.edu.hk](mailto:dan.tsang@polyu.edu.hk)

**Table S1.** Details of the reactors used in this study

| Model                      | FlexiWAVE      | Monowave 300                      | Monowave 50         | Discover SP         |
|----------------------------|----------------|-----------------------------------|---------------------|---------------------|
| Manufacturer               | Milestone      | Anton Paar                        | Anton Paar          | CEM                 |
| Heat source                | MW             | MW                                | Convention heating  | MW                  |
| Abbreviation in this study | -              | AP-MW                             | AP-CH               | -                   |
| Vessel size & material     | 100 mL, Teflon | 10 mL, borosilicate               | 10 mL, borosilicate | 10 mL, borosilicate |
| Reaction                   | Hydrolysis     | Hydrolysis                        | Hydrolysis          | Pyrolysis           |
| Temperature sensor         | FO             | FO & IR <sup>a</sup> , or IR only | IR                  | IR                  |

<sup>a</sup> Power was controlled based on temperature measured by a FO sensor.

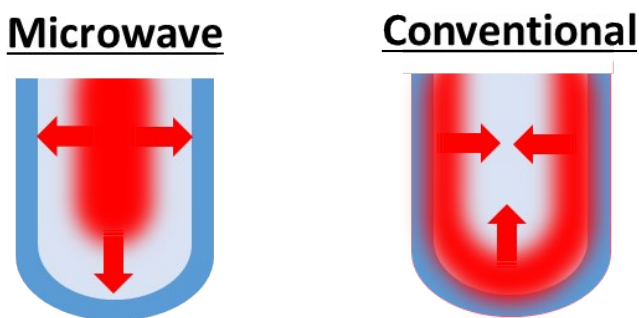

**Figure S1.** Heat generation and flow direction in microwaves (MWs) and conventional heating.

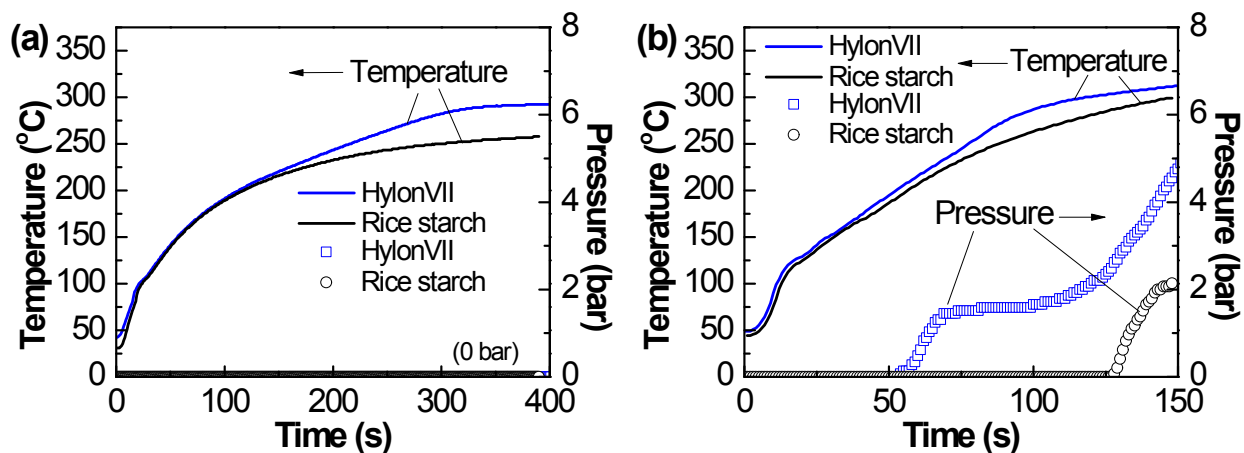

**Figure S2.** Temperature and pressure profiles of pyrolysis of rice starch and Hylon VII at a fixed power of 300 W in Discover SP (no water addition) at the solid loadings of (a) 0.1 g and (b) 0.3 g.

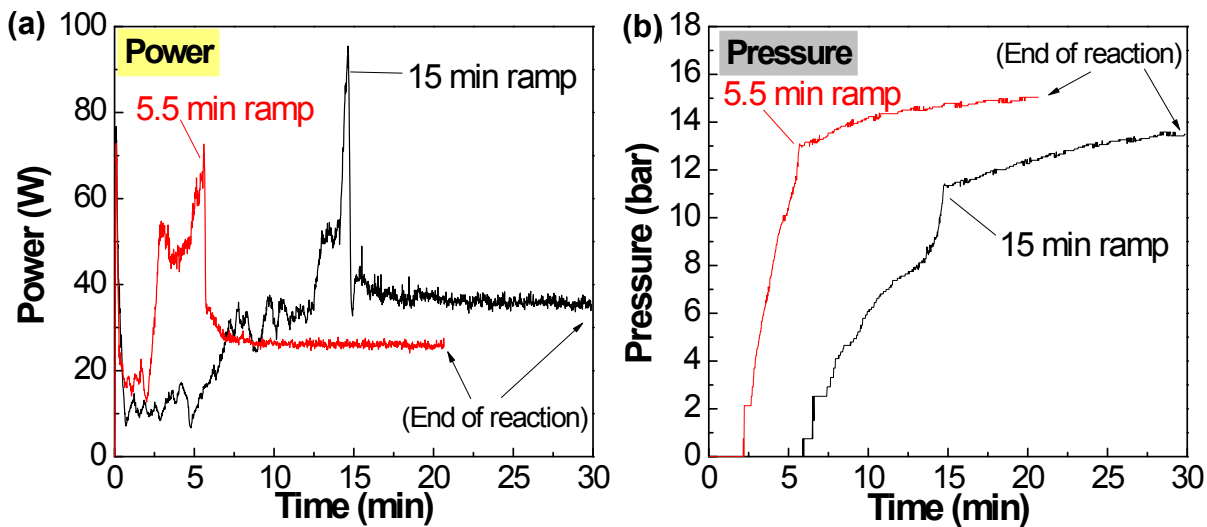

**Figure S3.** (a) Power and (b) pressure during starch hydrolysis at 200 °C with a ramp time of 5.5 min and 15 min (15 min holding, solid to water 1:20 wt/wt, FO-controlled AP-MW).
